# Supplementary material
Source: publisher site journal article supplement (https://www.dovepress.com/article/402279)
Supplement: Supplementary file 1 [file get_supplementary_file.php]

Supplementary file Table 1. Antimicrobial susceptibility testing of gram-negative bacterial isolates

| **Resistance pattern** | ***Acinetobacter specie*** | ***Edwardsiella Specie*** | ***Enterobacter cloacae*** | ***Escherchia coli*** | ***Escherchia coli (A-D)*** | ***klebsiella oxytoca*** | ***klebsiella pneumonia*** | ***Morgenella morganii*** | ***Protiouse mirabilus*** | ***Providencia specie*** | ***Pseudomonas aeruginosa*** | ***Pseudomonas specie*** | ***Raoultella ornithinolytica*** | **Total** |
| --- | --- | --- | --- | --- | --- | --- | --- | --- | --- | --- | --- | --- | --- | --- |
| AML I | 0 (0.0%) | 0 (0.0%) | 0 (0.0%) | 0 (0.0) | 0 (0.0) | 0 (0.0%) | 0 (0.0%) | 0 (0.0%) | 0 (0.0%) | 0 (0.0%) | 0 (0.0%) | 0 (0.0%) | 0 (0.0%) | 0 (0.0%) |
| R | 3 (100%) | 1 (100%) | 0 (0.0%) | 47 (100%) | 4 (100%) | 3 (100%) | 11 (100%) | 1 (100%) | 0 (0.0%) | 5 (100%) | 4 (100%) | 4 (100%) | 0 (0.0%) | 83 (100%) |
| S | 0 (0.0%) | 0 (0.0%) | 0 (0.0%) | 0 (0.0) | 0 (0.0) | 0 (0.0%) | 0 (0.0%) | 0 (0.0%) | 0 (0.0%) | 0 (0.0%) | 0 (0.0%) | 0 (0.0%) | 0 (0.0%) | 0 (0.0%) |
| **TOTAL** | **3 (100%)** | **1 (100%)** | **0 (0.0%)** | **47 (100%)** | **4 (100%)** | **3 (100%)** | **11 (100%)** | **1 (100%)** | **0 (0.0%)** | **5 (100%)** | **4 (100%)** | **4 (100%)** | **0 (0.0%)** | **83 (100%)** |
| AMP I | 0 (0.0%) | 0 (0.0%) | 0 (0.0%) | 0 (0.0%) | 0 (0.0%) | 0 (0.0%) | 0 (0.0%) | 0 (0.0%) | 0 (0.0%) | 0 (0.0%) | 0 (0.0%) | 0 (0.0%) | 0 (0.0%) | 0 (0.0%) |
| R | 3 (100%) | 1 (100%) | 1 (100%) | 53 (98.1%) | 4 (100%) | 3 (100%) | 11 (100%) | 1 (100%) | 0 (0.0%) | 5 (100%) | 4 (100%) | 4 (100%) | 1 (100%) | 91 (98.9%) |
| S | 0 (0.0%) | 0 (0.0%) | 0 (0.0%) | 1 (1.9%) | 0 (0.0%) | 0 (0.0%) | 0 (0.0%) | 0 (0.0%) | 0 (0.0%) | 0 (0.0%) | 0 (0.0%) | 0 (0.0%) | 0 (0.0%) | 1 (1.9%) |
| **TOTAL** | **3 (100%)** | **1 (100%)** | **1 (100%)** | **54 (100%)** | **4 (100%)** | **3 (100%)** | **11 (100%)** | **1 (100%)** | **0 (0.0%)** | **5 (100%)** | **4 (100%)** | **4 (100%)** | **1 (100%)** | **92 (100%)** |
| AMC I | 0 (0.0%) | 0 (0.0%) | 0 (0.0%) | 0 (0.0%) | 0 (0.0%) | 0 (0.0%) | 0 (0.0%) | 0 (0.0%) | 0 (0.0%) | 0 (0.0%) | 0 (0.0%) | 0 (0.0%) | **1 (100%)** | 1 (2.6%) |
| R | 3 (100%) | 0 (0.0%) | 1 (100%) | 18 (90.0%) | 1 (100%) | 0 (0.0%) | 4 (100%) | 0 (0.0%) | 0 (0.0%) | 1 (100%) | 3 (100%) | 4 (100%) | 0 (0.0%) | 35 (92.1%) |
| S | 0 (0.0%) | 0 (0.0%) | 0 (0.0%) | 2 (10.0%) | 0 (0.0%) | 0 (0.0%) | 0 (0.0%) | 0 (0.0%) | 0 (0.0%) | 0 (0.0%) | 0 (0.0%) | 0 (0.0%) | 0 (0.0%) | 2 (5.3%) |
| **TOTAL** | **3 (100%)** | **0 (0.0%)** | **1 (100%)** | **20 (100%)** | **1 (100%)** | **0 (0.0%)** | **4 (100%)** | **0 (0.0%)** | **0 (0.0%)** | **1 (100%)** | **3 (100%)** | **4 (100%)** | **1 (100%)** | **38 (100%)** |
| CZL I | 0 (0.0%) | 0 (0.0%) | 0 (0.0%) | 0 (0.0) | 0 (0.0) | 0 (0.0%) | 0 (0.0%) | 0 (0.0%) | 0 (0.0%) | 0 (0.0%) | 0 (0.0%) | 0 (0.0%) | 0 (0.0%) | 0 (0.0%) |
| R | 5 (100%) | 1 (100%) | 1 (100%) | 47 (65.3%) | 4 (66.7%) | 3 (100%) | 8 (80%) | 0 (0.0%) | 0 (0.0%) | 4 66.7%) | 4 (100%) | 4 (100%) | 1 (100%) | 82 (71.3%) |
| S | 0 (0.0%) | 0 (0.0%) | 0 (0.0%) | 25 (34.7%) | 2 (33.3%) | 0 (0.0%) | 2 (20.0%) | 1 (100%) | 1 (100%) | 2 (33.3%) | 0 (0.0%) | 0 (0.0%) | 0 (0.0%) | 33 (28.7%) |
| **TOTAL** | **5 (100%)** | **1 (100%)** | **1 (100%)** | **72 (100%)** | **6 (100%)** | **3 (100%)** | **10 (100%)** | **1 (100%)** | **1 (100%)** | **6 (100%)** | **4 (100%)** | **4 (100%)** | **1 (100%)** | **115 (100%)** |
| CFA I | 0 (0.0%) | 0 (0.0%) | 0 (0.0%) | 0 (0.0) | 0 (0.0) | 0 (0.0%) | 0 (0.0%) | 0 (0.0%) | 0 (0.0%) | 0 (0.0%) | 0 (0.0%) | 0 (0.0%) | 0 (0.0%) | 0 (0.0%) |
| R | 4 (80.0%) | 0 (0.0%) | 1 (100%) | 45 (67.2%) | 4 (66.7%) | 3 (100%) | 7 (77.8%) | 0 (0.0%) | 0 (0.0%) | 4 (66.7%) | 4 (100%) | 5 (100%) | 1 (100%) | 78 (71.6%) |
| S | 1 (20.0%) | 0 (0.0%) | 0 (0.0%) | 23 (32.8%) | 2 (33.3%) | 0 (0.0%) | 2 (22.2%) | 1 (100%) | 1 (100%) | 2 (33.3%) | 0 (0.0%) | 0 (0.0%) | 0 (0.0%) | 31 (28.4%) |
| **TOTAL** | **5 (100.0%)** | **0 (0.0%)** | **1 (100%)** | **67 (100%)** | **6 (100%)** | **3 (100%)** | **9 (100%)** | **1 (100%)** | **1 (100%)** | **6 (100%)** | **4 (100%)** | **5 (100%)** | **1 (100%)** | **109 (100%)** |
| FOX I | 0 (0.0%) | 0 (0.0%) | 0 (0.0%) | 2 (25%) | 0 (0.0%) | 0 (0.0%) | 0 (0.0%) | 0 (0.0%) | 0 (0.0%) | 0 (0.0%) | 0 (0.0%) | 0 (0.0%) | 0 (0.0%) | 2 (18.1%) |
| R | 0 (0.0%) | 0 (0.0%) | 1 (100%) | 3 (37.5%) | 0 (0.0%) | 0 (0.0%) | 0 (0.0%) | 0 (0.0%) | 0 (0.0%) | 0 (0.0%) | 1 (100%) | 0 (0.0%) | 0 (0.0%) | 5 (45.5%) |
| S | 0 (0.0%) | 0 (0.0%) | 1 (100%) | 3 (37.5%) | 0 (0.0%) | 0 (0.0%) | 0 (0.0%) | 0 (0.0%) | 0 (0.0%) | 0 (0.0%) | 0 (0.0%) | 0 (0.0%) | 1 (100%) | 4 (34.4) |
| **TOTAL** | **0 (0.0%)** | **0 (0.0%)** | **1 (100%)** | **8 (100%)** | **0 (0.0%)** | **0 (0.0%)** | **0 (0.0%)** | **0 (0.0%)** | **0 (0.0%)** | **0 (0.0%)** | **1 (100%)** | **0 (0.0%)** | **1 (100%)** | **11 (100%)** |
| CFU I | 0 (0.0%) | 0 (0.0%) | 0 (0.0%) | 1 (1.6%) | 0 (0.0) | 0 (0.0%) | 0 (0.0%) | 0 (0.0%) | 0 (0.0%) | 0 (0.0%) | 0 (0.0%) | 0 (0.0%) | 0 (0.0%) | 1 (1.0%) |
| R | 4 (100%) | 0 (0.0%) | 1 (100%) | 35 (56.5%) | 1 (33.3%) | 3 (100%) | 5 (50.0%) | 0 (0.0%) | 0 (0.0%) | 4 (66.7%) | 4 (100%) | 5 (100%) | 0 (0.0%) | 62 (62%) |
| S | 0 (0.0%) | 1 (100%) | 0 (0.0%) | 26 (41.9%) | 2 (66.7%) | 0 (0.0%) | 5 (50.0%) | 1 (100%) | 0 (0.0%) | 2 (33.3%) | 0 (0.0%) | 0 (0.0%) | 0 (0.0%) | 37 (37%) |
| **TOTAL** | **4 (100%)** | **1 (100%)** | **1 (100%)** | **62 (100%)** | **3 (100%)** | **3 (100%)** | **10 (100%)** | **1 (100%)** | **0 (0.0%)** | **6 (100%)** | **4 (100%)** | **5 (100%)** | **0 (0.0%)** | **100 (100%)** |
| FIX I | 0 (0.0%) | 0 (0.0%) | 0 (0.0%) | 0 (0.0%) | 0 (0.0%) | 0 (0.0%) | 0 (0.0%) | 0 (0.0%) | 0 (0.0%) | 0 (0.0%) | 0 (0.0%) | 0 (0.0%) | 0 (0.0%) | 0 (0.0%) |
| R | 5 (100%) | 0 (0.0%) | 0 (0.0%) | 27 (46.6%) | 1 (16.7%) | 3 (100%) | 5 (45.5%) | 0 (0.0%) | 0 (0.0%) | 4 (66.7%) | 4 (100%) | 4 (100%) | 0 (0.0%) | 53 (53.5%) |
| S | 0 (0.0%) | 0 (0.0%) | 0 (0.0%) | 31 (53.4%) | 5 (83.3%) | 0 (0.0%) | 6 (54.5%) | 1 (100%) | 1 (100%) | 2 (33.3%) | 0 (0.0%) | 0 (0.0%) | 0 (0.0%) | 46 (46.7%) |
| **TOTAL** | **5 (100%)** | **0 (0.0%)** | **0 (0.0%)** | **58 (100%)** | **6 (100%)** | **3 (100%)** | **11 (100%)** | **1 (100%)** | **1 (100%)** | **6 (100%)** | **4 (100%)** | **4 (100%)** | **0 (0.0%)** | **99 (100%)** |
| CTX I | 0 (0.0%) | 0 (0.0%) | 0 (0.0%) | 0 (0.0%) | 0 (0.0%) | 0 (0.0%) | 0 (0.0%) | 0 (0.0%) | 0 (0.0%) | 0 (0.0%) | 0 (0.0%) | 0 (0.0%) | 0 (0.0%) | 0 (0.0%) |
| R | 4 (80%) | 0 (0.0%) | 0 (0.0%) | 19 (35.8%) | 0 (0.0%) | 2 (100%) | 4 (40.0%) | 0 (0.0%) | 0 (0.0%) | 4 (66.7%) | 4 (100%) | 5 (100%) | 0 (0.0%) | 42 (45.2%) |
| S | 1 (20.0%) | 1 (100%) | 0 (0.0%) | 34 (64.2%) | 5 (100%) | 0 (0.0%) | 6 (60.0%) | 1 (100%) | 1 (100%) | 2 (33.3%) | 0 (0.0%) | 0 (0.0%) | 0 (0.0%) | 51 (54.8%) |
| **TOTAL** | **5 (100%)** | **1 (100%)** | **0 (0.0%)** | **53 (100%)** | **5 (100%)** | **2 (100%)** | **10 (100%)** | **1 (100%)** | **1 (100%)** | **6 (100%)** | **4 (100%)** | **5 (100%)** | **0 (0.0%)** | **93 (100%)** |
| CRO I | 0 (0.0%) | 0 (0.0%) | 0 (0.0%) | 0 (0.0%) | 0 (0.0%) | 0 (0.0%) | 0 (0.0%) | 0 (0.0%) | 0 (0.0%) | 0 (0.0%) | 0 (0.0%) | 0 (0.0%) | 0 (0.0%) | 0 (0.0%) |
| R | 4 (80.0%) | 0 (0.0%) | 1 (100%) | 24 (42.1%) | 0 (0.0%) | 2 (100%) | 4 (40.0%) | 0 (0.0%) | 0 (0.0%) | 4 (66.7%) | 4 (100%) | 4 (80%) | 0 (0.0%) | 47 (47.5%) |
| S | 1 (20.0%) | 1 (100%) | 0 (0.0%) | 33 (57.9%) | 5 (100%) | 0 (0.0%) | 6 (60.0%) | 1 (100%) | 1 (100%) | 2 (33.3%) | 0 (0.0%) | 1 (20.0%) | 1 (100%) | 52 (52.5%) |
| **TOTAL** | **5 (100%)** | **1 (100%)** | **1 (100%)** | **57 (100%)** | **5 (100%)** | **2 (100%)** | **10 (100%)** | **1 (100%)** | **1 (100%)** | **6 (100%)** | **4 (100%)** | **5 (100%)** | **1 (100%)** | **99 (100/%)** |
| CZM I | 0 (0.0%) | 0 (0.0%) | 0 (0.0%) | 0 (0.0%) | 0 (0.0%) | 0 (0.0%) | 0 (0.0%) | 0 (0.0%) | 0 (0.0%) | 0 (0.0%) | 0 (0.0%) | 0 (0.0%) | 0 (0.0%) | 0 (0.0%) |
| R | 4 (100%) | 0 (0.0%) | 1 (100%) | 11 (34.4%) | 0 (0.0%) | 0 (0.0%) | 1 (33.3%) | 0 (0.0%) | 0 (0.0%) | 0 (0.0%) | 1 (100%) | 2 (50.0%) | 0 (0.0%) | 20 (39.2%) |
| S | 0 (0.0%) | 0 (0.0%) | 0 (0.0%) | 21 (65.6%) | 2 (100%) | 0 (0.0%) | 2 (66.7%) | 1 (100%) | 0 (0.0%) | 2 (100%) | 0 (0.0%) | 2 (50.0%) | 1 (100%) | 31 (60.8%) |
| **TOTAL** | **4 (100%)** | **0 (0.0%)** | **1 (100%)** | **32 (100%)** | **2 (100%)** | **0 (0.0%)** | **3 (100%)** | **1 (100%)** | **0 (0.0%)** | **2(100%)** | **1 (100%)** | **4 (100%)** | **1 (100%)** | **51 (100%)** |
| CIP I | 0 (0.0%) | 0 (0.0%) | 0 (0.0%) | 1 (2.7%) | 0 (0.0%) | 0 (0.0%) | 0 (0.0%) | 0 (0.0%) | 0 (0.0%) | 0 (0.0%) | 0 (0.0%) | 0 (0.0%) | 0 (0.0%) | 1 (2.1%) |
| R | 0 (0.0%) | 0 (0.0%) | 1 (100%) | 15 (40.5%) | 1 (50.0%) | 0 (0.0%) | 2 (100%) | 0 (0.0%) | 0 (0.0%) | 1 (20.0%) | 0 (0.0%) | 0 (0.0%) | 0 (0.0%) | 20 (40.9%) |
| S | 0 (0.0%) | 0 (0.0%) | 0 (0.0%) | 21 (56.8%) | 1 (50.0%) | 0 (0.0%) | 0 (0.0%) | 0 (0.0%) | 0 (0.0%) | 4 (80.0%) | 1 (100%) | 0 (0.0%) | 1 (100%) | 28 (57.1%) |
| **TOTAL** | **0 (0.0%)** | **0 (0.0%)** | **1 (100%)** | **37 (100%)** | **2 (100%)** | **0 (0.0%)** | **2 (100%)** | **0 (0.0%)** | **0 (0.0%)** | **5 (100%)** | **1 (100%)** | **0 (0.0%)** | **1 (100%)** | **49 (100%)** |
| F I | 0 (0.0%) | 0 (0.0%) | 0 (0.0%) | 1 (2.1%) | 0 (0.0%) | 0 (0.0%) | 0 (0.0%) | 0 (0.0%) | 0 (0.0%) | 0 (0.0%) | 0 (0.0%) | 0 (0.0%) | 1 (100%) | 2 (2.7%) |
| R | 2 (100%) | 0 (0.0%) | 1 (100%) | 25 (53.2%) | 3 (100%) | 1 (100%) | 5 (62.5%) | 1 (100%) | 1 (100%) | 1 (50.0%) | 4 (100%) | 2 (66.7%) | 0 (0.0%) | 46 (62.2%) |
| S | 0 (0.0%) | 0 (0.0%) | 0 (0.0%) | 21 (44.7%) | 0 (0.0%) | 0 (0.0%) | 3 (37.5%) | 0 (0.0%) | 0 (0.0%) | 1 (50.0%) | 0 (0.0%) | 1 (33.3%) | 0 (0.0%) | 26 (35.1%) |
| **TOTAL** | **2 (100%)** | **0 (0.0%)** | **1 (100%)** | **47 (100%)** | **3 (100%)** | **1 (100%)** | **8 (100%)** | **1 (100%)** | **1 (100%)** | **2 (100%)** | **4 (100%)** | **3 (100%)** | **1 (100%)** | **74 (100%)** |
| NOR I | 0 (0.0%) | 0 (0.0%) | 0 (0.0%) | 0 (0.0%) | 0 (0.0%) | 0 (0.0%) | 0 (0.0%) | 0 (0.0%) | 0 (0.0%) | 0 (0.0%) | 0 (0.0%) | 0 (0.0%) | 0 (0.0%) | 0 (0.0%) |
| R | 2 (100%) | 0 (0.0%) | 0 (0.0%) | 15 (50.0%) | 2 (100%) | 0 (0.0%) | 6 (100%) | 0 (0.0%) | 0 (0.0%) | 1 (25.0%) | 0 (0.0%) | 1 (100%) | 0 (0.0%) | 27 (57.4%) |
| S | 0 (0.0%) | 0 (0.0%) | 0 (0.0%) | 15 (50.0%) | 0 (0.0%) | 0 (0.0%) | 0 (0.0%) | 0 (0.0%) | 1 (100%) | 3 (75%) | 1 (100%) | 0 (0.0%) | 0 (0.0%) | 20 (42.6%) |
| **TOTAL** | **2 (100%)** | **0 (0.0%)** | **0 (0.0%)** | **30 (100%)** | **2 (100%)** | **0 (0.0%)** | **6 (100%)** | **0 (0.0%)** | **1 (100%)** | **4 (100%)** | **1 (100%)** | **1 (100%)** | **0 (0.0%)** | **47 (100%)** |
| TTC I | 0 (0.0%) | 0 (0.0%) | 0 (0.0%) | 0 (0.0%) | 0 (0.0%) | 0 (0.0%) | 0 (0.0%) | 0 (0.0%) | 0 (0.0%) | 0 (0.0%) | 0 (0.0%) | 0 (0.0%) | 0 (0.0%) | 0 (0.0%) |
| R | 3 (100%) | 0 (0.0%) | 1 (100%) | 51 (87.9%) | 4 (100%) | 2 (100%) | 10 (90.9%) | 1 (100%) | 1 (100%) | 4 (80.0%) | 3 (100%) | 3 (100%) | 0 (0.0%) | 83 (89.2%) |
| S | 0 (0.0%) | 0 (0.0%) | 0 (0.0%) | 7 (12.1%) | 0 (0.0%) | 0 (0.0%) | 1 (9.1%) | 0 (0.0%) | 0 (0.0%) | 1 (20.0%) | 0 (0.0%) | 0 (0.0%) | 1 (100%) | 10 (10.8%) |
| **TOTAL** | **3 (100%)** | **0 (0.0%)** | **1 (100%)** | **58 (100%)** | **4 (100%)** | **2 (100%)** | **11(100%)** | **1 (100%)** | **1 (100%)** | **5 (100%)** | **3 (100%)** | **3 (100%)** | **1 (100%)** | **93 (100%)** |
| SXT I | 0 (0.0%) | 0 (0.0%) | 0 (0.0%) | 0 (0.0%) | 0 (0.0%) | 0 (0.0%) | 0 (0.0%) | 0 (0.0%) | 0 (0.0%) | 0 (0.0%) | 0 (0.0%) | 0 (0.0%) | 0 (0.0%) | 0 (0.0%) |
| R | 1 (100%) | 0 (0.0%) | 0 (0.0%) | 16 (80.0%) | 1 (100%) | 1 (100%) | 1 (100%) | 0 (0.0%) | 0 (0.0%) | 1 (100%) | 0 (0.0%) | 2 (66.7%) | 0 (0.0%) | 23 (76.7%) |
| S | 0 (0.0%) | 0 (0.0%) | 1 (100%) | 4 (20.0%) | 0 (0.0) | 3 (9.1) | 7 (5.0) | 0 (0.0%) | 0 (0.0%) | 0 (0.0%) | 0 (0.0%) | 1 (33.3%) | 1 (100%) | 7 (23.3%) |
| **TOTAL** | 1 (100%) | **0 (0.0%)** | 1 (100%) | **20 (100%)** | 1 (100%) | 1 (100%) | 1 (100%) | **0 (0.0%)** | **0 (0.0%)** | 1 (100%) | **0 (0.0%)** | **3 (100%)** | **1 (100%)** | **30 (100%)** |
| AMK I | 0 (0.0%) | 0 (0.0%) | 0 (0.0%) | 0 (0.0%) | 0 (0.0%) | 0 (0.0%) | 0 (0.0%) | 0 (0.0%) | 0 (0.0%) | 1 (16.7%) | 0 (0.0%) | 0 (0.0%) | 0 (0.0%) | 1 (1.3%) |
| R | 0 (0.0%) | 0 (0.0%) | 0 (0.0%) | 1 (2.2%) | 0 (0.0) | 0 (0.0) | 0 (0.0) | 0 (0.0%) | 0 (0.0%) | 1 (16.7%) | 0 (0.0%) | 1 (33.3%) | 0 (0.0%) | 3 (3.9%) |
| S | 5 (100%) | 1 (100%) | 0 (0.0%) | 44 (97.8%) | 3 (100%) | 2 (100%) | 8 (100%) | 0 (0.0%) | 0 (0.0%) | 4 (66.7%) | 4 (100%) | 2 (66.7%) | 0 (0.0%) | 73 (94.8%) |
| **TOTAL** | **5 (100%)** | **1 (100%)** | **0 (0.0%)** | **45 (100%)** | **3 (100%)** | **2 (100%)** | **8 (100%)** | **0 (0.0%)** | **0 (0.0%)** | **6 (100%)** | **4 (100%)** | **3 (100%)** | **0 (0.0%)** | **77 (100%)** |
| MEM I | 0 (0.0%) | 0 (0.0%) | 0 (0.0%) | 1 (9.1%) | 0 (0.0%) | 0 (0.0%) | 0 (0.0%) | 0 (0.0%) | 0 (0.0%) | 0 (0.0%) | 0 (0.0%) | 0 (0.0%) | 0 (0.0%) | 0 (0.0%) |
| R | 3 (100%) | 0 (0.0%) | 0 (0.0%) | 4 (36.4%) | 0 (0.0%) | 1 (100%) | 0 (0.0%) | 0 (0.0%) | 0 (0.0%) | 0 (0.0%) | 1 (100%) | 2 (50.0%) | 0 (0.0%) | 11 (52.3%) |
| S | 0 (0.0%) | 0 (0.0%) | 0 (0.0%) | 6 (54.5%) | 0 (0.0%) | 0 (0.0%) | 0 (0.0%) | 0 (0.0%) | 0 (0.0%) | 1 (100%) | 0 (0.0%) | 2 (50.0%) | 0 (0.0%) | 9 (42.9%) |
| **TOTAL** | **3 (100%)** | **0 (0.0%)** | **0 (0.0%)** | **11 (100%)** | **0 (0.0%)** | **1 (100%)** | **0 (0.0%)** | **0 (0.0%)** | **0 (0.0%)** | **1 (100%)** | **1 (100%)** | **4 (100%)** | **0 (0.0%)** | **21 (100%)** |
| TZP I | 0 (0.0%) | 0 (0.0%) | 0 (0.0%) | 0 (0.0%) | 0 (0.0%) | 0 (0.0%) | 0 (0.0%) | 0 (0.0%) | 0 (0.0%) | 0 (0.0%) | 0 (0.0%) | 0 (0.0%) | 0 (0.0%) | 0 (0.0%) |
| R | 0 (0.0%) | 0 (0.0%) | 1 (100%) | 2 (25.0%) | 0 (0.0%) | 0 (0.0%) | 0 (0.0%) | 0 (0.0%) | 0 (0.0%) | 0 (0.0%) | 0 (0.0%) | 0 (0.0%) | 0 (0.0%) | 3 (27.3%) |
| S | 0 (0.0%) | 0 (0.0%) | 0 (0.0%) | 6 (75.0%) | 0 (0.0%) | 0 (0.0%) | 0 (0.0%) | 0 (0.0%) | 0 (0.0%) | 0 (0.0%) | 0 (0.0%) | 2 (100%) | 0 (0.0%) | 8 (72.7%) |
| **TOTAL** | **0 (0.0%)** | **0 (0.0%)** | **1 (100%)** | **8 (100%)** | **0 (0.0%)** | **0 (0.0%)** | **0 (0.0%)** | **0 (0.0%)** | **0 (0.0%)** | **0 (0.0%)** | **0 (0.0%)** | **2 (100%)** | **0 (0.0%)** | **11 (100%)** |
| TM I | 0 (0.0%) | 0 (0.0%) | 0 (0.0%) | 4 (12.1%) | 0 (0.0%) | 0 (0.0%) | 0 (0.0%) | 0 (0.0%) | 0 (0.0%) | 0 (0.0%) | 0 (0.0%) | 0 (0.0%) | 0 (0.0%) | 4 (8.2%) |
| R | 1 (100%) | 0 (0.0%) | 0 (0.0%) | 8 (24.2%) | 0 (0.0%) | 1 (50.0%) | 1 (20.0%) | 0 (0.0%) | 0 (0.0%) | 0 (0.0%) | 0 (0.0%) | 1 (100%) | 0 (0.0%) | 12 (24.5%) |
| S | 0 (0.0%) | 1 (100%) | 1 (100%) | 21 (63.6%) | 1 100%) | 1 (50.0%) | 4 (80.0%) | 0 (0.0%) | 0 (0.0%) | 2 (100%) | 1 (100%) | 0 (0.0%) | 1 (100%) | 33 (67.3%) |
| **TOTAL** | **1 (100%)** | **1 (100%)** | **1 (100%)** | **33 (100%)** | **1 (100%)** | **2 (100%)** | **5 (100%)** | **0 (0.0%)** | **0 (0.0%)** | **2 (100%)** | **1 (100%)** | **1 (100%)** | **1 (100%)** | **49 (100%)** |
|  |  |  |  |  |  |  |  |  |  |  |  |  |  |  |
|  |  |  |  |  |  |  |  |  |  |  |  |  |  |  |
| LEV I | 0 (0.0%) | 0 (0.0%) | 0 (0.0%) | 0 (0.0%) | 0 (0.0%) | 0 (0.0%) | 0 (0.0%) | 0 (0.0%) | 0 (0.0%) | 0 (0.0%) | 0 (0.0%) | 0 (0.0%) | 0 (0.0%) | 0 (0.0%) |
| R | 0 (0.0%) | 0 (0.0%) | 1 (100%) | 8 (21.1%) | 1 (50.0%) | 0 (0.0%) | 0 (0.0%) | 0 (0.0%) | 0 (0.0%) | 0 (0.0%) | 0 (0.0%) | 0 (0.0%) | 0 (0.0%) | 10 (19.6%) |
| S | 0 (0.0%) | 0 (0.0%) | 0 (0.0%) | 30 (78.9%) | 1 (50.0%) | 1 (100%) | 2 (100%) | 0 (0.0%) | 1 (100%) | 4 (100%) | 1 (100%) | 0 (0.0%) | 1 (100%) | 41 (80.4%) |
| **TOTAL** | **0 (0.0%)** | **0 (0.0%)** | **1 (100%)** | **38 (100%)** | **2 (100%)** | **1 (100%)** | **2 (100%)** | **0 (0.0%)** | **1 (100%)** | **4 (100%)** | **1 (100%)** | **0 (0.0%)** | **1 (100%)** | **51 (100%)** |
| MOX I | 0 (0.0%) | 0 (0.0%) | 0 (0.0%) | 0 (0.0%) | 0 (0.0%) | 0 (0.0%) | 0 (0.0%) | 0 (0.0%) | 0 (0.0%) | 0 (0.0%) | 0 (0.0%) | 0 (0.0%) | 0 (0.0%) | 0 (0.0%) |
| R | 0 (0.0%) | 0 (0.0%) | 0 (0.0%) | 1 (100%) | 1 (100%) | 0 (0.0%) | 0 (0.0%) | 0 (0.0%) | 0 (0.0%) | 0 (0.0%) | 0 (0.0%) | 1 (100%) | 0 (0.0%) | 3 (7.7%) |
| S | 0 (0.0%) | 0 (0.0%) | 0 (0.0%) | 27 (96.4%) | 1 (100%) | 0 (0.0%) | 2 (100%) | 0 (0.0%) | 1 (100%) | 4 (100%) | 1 (100%) | 0 (0.0%) | 0 (0.0%) | 36 (92.3%) |
| **TOTAL** | **0 (0.0%)** | **0 (0.0%)** | **0 (0.0%)** | **28 (100%)** | **2 (100%)** | **0 (0.0%)** | **2 (100%)** | **0 (0.0%)** | **1 (100%)** | **4 (100%)** | **1 (100%)** | **1 (100%)** | **0 (0.0%)** | **39 (100%)** |
| CFP I | 0 (0.0%) | 0 (0.0%) | 0 (0.0%) | 0 (0.0%) | 0 (0.0%) | 0 (0.0%) | 0 (0.0%) | 0 (0.0%) | 0 (0.0%) | 0 (0.0%) | 0 (0.0%) | 0 (0.0%) | 0 (0.0%) | 0 (0.0%) |
| R | 0 (0.0%) | 0 (0.0%) | 1 (100%) | 9 (45.0%) | 0 (0.0%) | 0 (0.0%) | 1 (100%) | 0 (0.0%) | 0 (0.0%) | 0 (0.0%) | 0 (0.0%) | 0 (0.0%) | 0 (0.0%) | 11 (42.3%) |
| S | 0 (0.0%) | 1 (100%) | 0 (0.0%) | 11 (55.0%) | 1 (100%) | 0 (0.0%) | 0 (0.0%) | 0 (0.0%) | 0 (0.0%) | 0 (0.0%) | 0 (0.0%) | 1 (100%) | 1 (100%) | 15 (57.7%) |
| **TOTAL** | **0 (0.0%)** | **1 (100%)** | **1 (100%)** | **20 (100%)** | **1 (100%)** | **0 (0.0%)** | **1 (100%)** | **0 (0.0%)** | **0 (0.0%)** | **0 (0.0%)** | **0 (0.0%)** | **1 (100%)** | **1 (100%)** | **26 (100%)** |
| AS I | 0 (0.0%) | 0 (0.0%) | 0 (0.0%) | 0 (0.0%) | 0 (0.0%) | 0 (0.0%) | 0 (0.0%) | 0 (0.0%) | 0 (0.0%) | 0 (0.0%) | 0 (0.0%) | 0 (0.0%) | 0 (0.0%) | 0 (0.0%) |
| R | 0 (0.0%) | 0 (0.0%) | 0 (0.0%) | 2 (100%) | 0 (0.0%) | 0 (0.0%) | 0 (0.0%) | 0 (0.0%) | 0 (0.0%) | 0 (0.0%) | 0 (0.0%) | 0 (0.0%) | 0 (0.0%) | 2 (100%) |
| S | 0 (0.0%) | 0 (0.0%) | 0 (0.0%) | 0 (0.0%) | 0 (0.0%) | 0 (0.0%) | 0 (0.0%) | 0 (0.0%) | 0 (0.0%) | 0 (0.0%) | 0 (0.0%) | 0 (0.0%) | 0 (0.0%) | 0 (0.0%) |
| **TOTAL** | **0 (0.0%)** | **0 (0.0%)** | **0 (0.0%)** | **2 (100%)** | **0 (0.0%)** | **0 (0.0%)** | **0 (0.0%)** | **0 (0.0%)** | **0 (0.0%)** | **0 (0.0%)** | **0 (0.0%)** | **0 (0.0%)** | **0 (0.0%)** | **2 (100%)** |
| DOX I | 0 (0.0%) | 0 (0.0%) | 0 (0.0%) | 0 (0.0%) | 0 (0.0%) | 0 (0.0%) | 0 (0.0%) | 0 (0.0%) | 0 (0.0%) | 0 (0.0%) | 0 (0.0%) | 0 (0.0%) | 0 (0.0%) | 0 (0.0%) |
| R | 2 (100%) | 0 (0.0%) | 0 (0.0%) | 41 (85.4%) | 4 (100%) | 2 (100%) | 10 (90.9%) | 1 (100%) | 1 (100%) | 3 (60.0%) | 3 (100%) | 3 (100%) | 0 (0.0%) | 70 (87.5%) |
| S | 0 (0.0%) | 0 (0.0%) | 0 (0.0%) | 7 (14.6%) | 0 (0.0%) | 0 (0.0%) | 1 (9.1%) | 0 (0.0%) | 0 (0.0%) | 0 (0.0%) | 0 (0.0%) | 0 (0.0%) | 0 (0.0%) | 10 (12.5%) |
| **TOTAL** | **2 (100%)** | **0 (0.0%)** | **0 (0.0%)** | **48 (100%)** | **4 (100%)** | **2 (100%)** | **11 (100%)** | **1 (100%)** | **1 (100%)** | **5 (100%)** | **3 (100%)** | **3 (100%)** | **0 (0.0%)** | **80 (100%)** |
| GM I | 0 (0.0%) | 0 (0.0%) | 0 (0.0%) | 1 (1.7%) | 0 (0.0%) | 0 (0.0%) | 0 (0.0%) | 0 (0.0%) | 0 (0.0%) | 1 (20.0%) | 2 (66.7%) | 0 (0.0%) | 0 (0.0%) | 4 (4.6%) |
| R | 1 (25.0%) | 0 (0.0%) | 0 (0.0%) | 14 (24.1%) | 2 (50.0%) | 0 (0.0%) | 2 (33.3%) | 0 (0.0%) | 0 (0.0%) | 2 (40.0%) | 0 (0.0%) | 2 (50.0%) | 0 (0.0%) | 23 (26.1%) |
| S | 3 (75.0%) | 0 (0.0%) | 1 (100%) | 43 (74.1%) | 2 (50.0%) | 2 (100%) | 4 (66.7%) | 0 (0.0%) | 0 (0.0%) | 2 (40.0%) | 1 (33.3%) | 2 (50.0%) | 1 (100%) | 61 (69.3%) |
| **TOTAL** | **4 (100%)** | **0 (0.0%)** | **1 (100%)** | **58 (100%)** | **4 (100%)** | **2 (100%)** | **6 (100%)** | **0 (0.0%)** | **0 (0.0%)** | **5 (100%)** | **3 (100%)** | **4 (100%)** | **1 (100%)** | **80 (100%)** |

*AML=Amoxicillin, AMP=Ampicilline, AMC=Agumentine,, CZL=Cefazoline, CFA=Cephalothine, FOX=Cefoxitine, CFU=Cefuroxime, FIX= Cefixime, CTX=Cefotaxime, CRO=Ceftriaxone, CZM=Ceftazidime, CIP=Ciprofloxacine, F=Nitrofurantoine, NOR=Norfloxacine, TTC=Tetracycline, SXT=Trimethoprime-sulfamethoxazole, AMK= Amikacin, MEM= Meropenem,, TZP=piperacillin/Tazobactam, TM=Tobramycin, LEV=Levofloxacin, =Moxifloxacin, =Amicilline-Sulbatam, =Doxycycline, GM=Gentamicin, I=Intermediate, S=Sensitive, R= Resistance*

##### Supplementary file Table 2: Antibiotic susceptibility pattern of Gram-positive isolates

| **Resistance pattern** | ***Enterococcus faecalis*** | ***Enterococcus faecium*** | ***Staphylococcus aureus*** | ***Total*** |
| --- | --- | --- | --- | --- |
| AML I | 0 (0.0%) | 0 (0.0%) | 0 (0.0%) | 0 (0.0%) |
| R | 1 (14.3%) | 7 (100%) | 2 (100%) | 10 (62.5%) |
| S | 6 (85.7%) | 0 (0.0%) | 0 (0.0%) | 6 (37.5%) |
| **TOTAL** | **7 (100%)** | **7 (100%)** | **2 (100%)** | **16 (100%)** |
| AMP I | 0 (0.0%) | 0 (0.0%) | 0 (0.0%) | 0 (0.0%) |
| R | 6 (100%) | 0 (0.0%) | 2 (100%) | 8 (58.8%) |
| S | 7 (87.5%) | 0 (0.0%) | 0 (0.0%) | 7 (41.2%) |
| **TOTAL** | **8 (100%)** | **7 (100%)** | **2 (100%)** | **17 (100%)** |
| AMC I | 0 (0.0%) | 0 (0.0%) | 0 (0.0%) | 0 (0.0%) |
| R | 0 (0.0%) | 0 (0.0%) | 0 (0.0%) | 0 (0.0%) |
| S | 6 (100%) | 0 (0.0%) | 2 (100%) | 8 (100%) |
| **TOTAL** | **6 (100%)** | **0 (0.0%)** | **2 (100%)** | **8 (100%)** |
| CZL I | 0 (0.0%) | 0 (0.0%) | 0 (0.0%) | 0 (0.0%) |
| R | 0 (0.0%) | 0 (0.0%) | 0 (0.0%) | 0 (0.0%) |
| S | 0 (0.0%) | 0 (0.0%) | 2 (100%) | 2 (100%) |
| **TOTAL** | **0 (0.0%)** | **0 (0.0%)** | **2 (100%)** | **2 (100%)** |
| CFA I | 0 (0.0%) | 0 (0.0%) | 0 (0.0%) | 0 (0.0%) |
| R | 0 (0.0%) | 0 (0.0%) | 0 (0.0%) | 0 (0.0%) |
| S | 0 (0.0%) | 0 (0.0%) | 2 (100%) | 2 (100%) |
| **TOTAL** | **0 (0.0%)** | **0 (0.0%)** | **2 (100%)** | **2 (100%)** |
| CFU I | 0 (0.0%) | 0 (0.0%) | 0 (0.0%) | 0 (0.0%) |
| R | 0 (0.0%) | 0 (0.0%) | 0 (0.0%) | 0 (0.0%) |
| S | 0 (0.0%) | 0 (0.0%) | 2 (100%) | 2 (100%) |
| **TOTAL** | **0 (0.0%)** | **0 (0.0%)** | **2 (100%)** | **2 (100%)** |
| CTX I | 0 (0.0%) | 0 (0.0%) | 0 (0.0%) | 0 (0.0%) |
| R | 0 (0.0%) | 0 (0.0%) | 0 (0.0%) | 0 (0.0%) |
| S | 0 (0.0%) | 0 (0.0%) | 2 (100%) | 2 (100%) |
| **TOTAL** | **0 (0.0%)** | **0 (0.0%)** | **2 (100%)** | **2 (100%)** |
| CRO I | 0 (0.0%) | 0 (0.0%) | 0 (0.0%) | 0 (0.0%) |
| R | 0 (0.0%) | 0 (0.0%) | 0 (0.0%) | 0 (0.0%) |
| S | 0 (0.0%) | 0 (0.0%) | 2 (100%) | 2 (100%) |
| **TOTAL** | **0 (0.0%)** | **0 (0.0%)** | **2 (100%)** | **2 (100%)** |
| CIP I | 0 (0.0%) | 0 (0.0%) | 0 (0.0%) | 0 (0.0%) |
| R | 1 (33.3%) | 1 (20.0%) | 0 (0.0%) | 2 (25%) |
| S | 2 (66.7%) | 4 (80.0%) | 0 (0.0%) | 6 (75%) |
| **TOTAL** | **3 (100%)** | **5 (100%)** | **0 (0.0%)** | **8 (100%)** |
| F I | 0 (0.0%) | 1 (25.0%) | 0 (0.0%) | 1 (11.1%) |
| R | 1 (20.0%) | 2 (50.0%) | 0 (0.0%) | 3 (33.3%) |
| S | 4 (80.0%) | 1 (25.0%) | 0 (0.0%) | 5 (55.6%) |
| **TOTAL** | **5 (100%)** | **4 (100%)** | **0 (0.0%)** | **9 (100%)** |
| NOR I | 0 (0.0%) | 0 (0.0%) | 0 (0.0%) | 0 (0.0%) |
| R | 2 (100%) | 1 (20.0%) | 1 (100%) | 4 (50.0%) |
| S | 0 (0.0%) | 4 (80.0%) | 0 (0.0%) | 4 (50.0%) |
| **TOTAL** | **2 (100%)** | **5 (100%)** | **1 (100%)** | **8 (100%)** |
| MET I | 0 (0.0%) | 0 (0.0%) | 0 (0.0%) | 0 (0.0%) |
| R | 0 (0.0%) | 0 (0.0%) | 0 (0.0%) | 0 (0.0%) |
| S | 0 (0.0%) | 0 (0.0%) | 2 (100%) | 2 (100%) |
| **TOTAL** | **0 (0.0%)** | **0 (0.0%)** | **2 (100%)** | **2 (100%)** |
| P I | 0 (0.0%) | 0 (0.0%) | 0 (0.0%) | 0 (0.0%) |
| R | 1 (14.3%) | 6 (100%) | 2 (100%) | 9 (60.0%) |
| S | 6 (85.7%) | 0 (0.0%) | 0 (0.0%) | 6 (40.0%) |
| **TOTAL** | **7 (100%)** | **6 (100%)** | **2 (100%)** | **15 (100%)** |
| TTC I | 0 (0.0%) | 0 (0.0%) | 0 (0.0%) | 0 (0.0%) |
| R | 6 (85.7%) | 4 (100%) | 0 (0.0%) | 10 (90.9%) |
| S | 1 (14.3%) | 0 (0.0%) | 0 (0.0%) | 1 (9.1%) |
| **TOTAL** | **7 (100%)** | **4 (100%)** | **0 (0.0%)** | **11 (100%)** |
| VA I | 0 (0.0%) | 0 (0.0%) | 0 (0.0%) | 0 (0.0%) |
| R | 0 (0.0%) | 0 (0.0%) | 0 (0.0%) | 0 (0.0%) |
| S | 1 (100%) | 4 (100%) | 0 (0.0%) | 5 (100%) |
| **TOTAL** | **1 (100%)** | **4 (100%)** | **0 (0.0%)** | **5 (100%)** |
| LEV I | 0 (0.0%) | 0 (0.0%) | 0 (0.0%) | 0 (0.0%) |
| R | 0 (0.0%) | 0 (0.0%) | 0 (0.0%) | 0 (0.0%) |
| S | 2 (100%) | 4 (100%) | 0 (0.0%) | 6 (100%) |
| **TOTAL** | **2 (100%)** | **4 (100%)** | **0 (0.0%)** | **6 (100%)** |
| MOX I | 0 (0.0%) | 0 (0.0%) | 0 (0.0%) | 0 (0.0%) |
| R | 0 (0.0%) | 0 (0.0%) | 0 (0.0%) | 0 (0.0%) |
| S | 2 (100%) | 4 (100%) | 0 (0.0%) | 6 (100%) |
| **TOTAL** | **2 (100%)** | **4 (100%)** | **0 (0.0%)** | **6 (100%)** |
| AS I | 0 (0.0%) | 0 (0.0%) | 0 (0.0%) | 0 (0.0%) |
| R | 1 (50.0%) | 0 (0.0%) | 0 (0.0%) | 1 (50.0%) |
| S | 1 (50.0%) | 0 (0.0%) | 0 (0.0%) | 1 (50.0%) |
| **TOTAL** | **2 (100%)** | **0 (0.0%)** | **0 (0.0%)** | **2 (100%)** |
| DOX I | 0 (0.0%) | 0 (0.0%) | 0 (0.0%) | 0 (0.0%) |
| R | 5 (83.3%) | 3 (100%) | 0 (0.0%) | 8 (88.8%) |
| S | 1 (16.7%) | 0 (0.0%) | 1 (100%) | 2 (11.1%) |
| **TOTAL** | **6 (100%)** | **3 (100%)** | **1 (100%)** | **10 (100%)** |
| GM I | 0 (0.0%) | 0 (0.0%) | 0 (0.0%) | 0 (0.0%) |
| R | 0 (0.0%) | 0 (0.0%) | 1 (50.0%) | 1 (50.0%) |
| S | 1 (100%) | 0 (0.0%) | 1 (50.0%) | 2 (66.7%) |
| **TOTAL** | **1 (100%)** | **0 (0.0%)** | **2 (100%)** | **3 (100%)** |
| LIN I | 0 (0.0%) | 0 (0.0%) | 0 (0.0%) | 0 (0.0%) |
| R | 0 (0.0%) | 0 (0.0%) | 0 (0.0%) | 0 (0.0%) |
| S | 0 (0.0%) | 2 (100%) | 0 (0.0%) | 2 (100%) |
| **TOTAL** | **0 (0.0%)** | **2 (100%)** | **0 (0.0%)** | **2 (100%)** |
